# Supplementary material for: Citizen science project characteristics: Connection to participants’ gains in knowledge and skills
Source: PubMed Central journal article supplement (PMC8282002; doi:10.1371/journal.pone.0253692), 2021-07-15
Supplement: pone.0253692.s001.pdf [file pone.0253692.s001.pdf]

## S1 File

### SUPPORTING INFORMATION

#### Article

Citizen science project characteristics: Connection to participants' gains in knowledge and skills

#### Authors

Maria Peter, Tim Diekötter, Tim Höffler, Kerstin Kremer

#### A. Citizen science projects participating in the study

*Table S1. Biodiversity citizen science projects included in our study (sorted alphabetically by country and project name).*

| <b>Country</b> | <b>Project name</b>                                                                  | <b>Coordinating organization</b>                                       |
|----------------|--------------------------------------------------------------------------------------|------------------------------------------------------------------------|
| Australia      | Batwatch/MEGA Murray-Darling Microbat Project                                        | Natural Resources South Australia Murray-Darling Basin, and partners   |
| Australia      | Birdwatch/Community Bird Monitoring                                                  | Natural Resources South Australia Murray-Darling Basin                 |
| Australia      | Canberra Nature Map                                                                  | Private (syndicate of volunteers)                                      |
| Australia      | ClimateWatch                                                                         | Earthwatch Institute Australia                                         |
| Australia      | DuneWatch                                                                            | Griffith University Centre for Coastal Management                      |
| Australia      | FrogWatch South Australia                                                            | FrogWatch South Australia/Green Adelaide                               |
| Australia      | New South Wales Bird Atlas                                                           | New South Wales Bird Atlassers Inc.                                    |
| Australia      | Reef Life Survey                                                                     | Reef Life Survey Foundation                                            |
| Australia      | Sea Slug Census                                                                      | Southern Cross University, and local partners                          |
| Australia      | Wild Pollinator Count                                                                | Wild Pollinator Count                                                  |
| Austria        | Amphibien und Reptilien Österreichs unter Beobachtung                                | Naturhistorisches Museum Wien                                          |
| Austria        | Biodiversitätsmonitoring mit LandwirtInnen - Wir schauen auf unsere Wiesen und Almen | Österreichisches Kuratorium für Landtechnik und Landentwicklung (ÖKL)  |
| Austria        | Naturbeobachtung.at                                                                  | Naturschutzbund Österreich                                             |
| Austria        | Pilzfinder.at                                                                        | Österreichische Mykologische Gesellschaft                              |
| Austria        | Schmetterlinge Österreichs                                                           | Blühendes Österreich - REWE International gemeinnützige Privatstiftung |
| Austria        | Vielfalt bewegt! Alpenverein von Jung bis Alt                                        | Österreichischer Alpenverein                                           |
| Austria        | Viel-Falter                                                                          | Universität Innsbruck                                                  |
| Denmark        | NaturTjek (Biodiversitet Nu)                                                         | Danmarks Naturfredningsforening                                        |
| Finland        | Butterfly Monitoring Scheme for Finland                                              | Finnish Environment Institute                                          |

| <b>Country</b> | <b>Project name</b>                                 | <b>Coordinating organization</b>                              |
|----------------|-----------------------------------------------------|---------------------------------------------------------------|
| Germany        | ArtenFinder                                         | Stiftung Natur und Umwelt Rheinland-Pfalz                     |
| Germany        | Kerbtier.de - Käferfauna Deutschlands               | Private (Christoph Benisch)                                   |
| Germany        | NABU   naturgucker                                  | naturgucker.de gemeinnützige eG                               |
| Germany        | Ornitho.de                                          | Dachverband Deutscher Avifaunisten                            |
| Germany        | StadtWildTiere Berlin                               | Leibniz-Institut für Zoo- und Wildtierforschung               |
| Ireland        | Countryside Bird Survey                             | BirdWatch Ireland                                             |
| Ireland        | Irish Garden Bird Survey                            | BirdWatch Ireland                                             |
| Ireland        | Irish Wetland Bird Survey                           | BirdWatch Ireland                                             |
| Netherlands    | Dutch Butterfly Monitoring Scheme - Meetnet vlinder | Vlinderstichting (Dutch Butterfly Conservation)               |
| Sweden         | Swedish Fauna Watch - Faunaväkteriet småkryp        | Swedish Entomological Society, and partners                   |
| Switzerland    | Atlas de la Flore Vaudoise                          | Cercle vaudois de botanique                                   |
| Switzerland    | Flora des Kantons Zürich                            | Zürcherische Botanische Gesellschaft                          |
| Switzerland    | Ornitho.ch                                          | Schweizerische Vogelwarte                                     |
| Switzerland    | StadtWildTiere Schweiz                              | Verein StadtNatur                                             |
| UK             | BeeWalk                                             | Bumblebee Conservation Trust                                  |
| UK             | BirdTrack                                           | British Trust for Ornithology                                 |
| UK             | Breeding Bird Survey                                | British Trust for Ornithology                                 |
| UK             | Bromley Swift Survey                                | Royal Society for the Protection of Birds Local Group Bromley |
| UK             | Dragonfly Watch                                     | British Dragonfly Society                                     |
| UK             | English Winter Bird Survey                          | British Trust for Ornithology                                 |
| UK             | Garden Bird Feeding Survey                          | British Trust for Ornithology                                 |
| UK             | Garden Bird Watch                                   | British Trust for Ornithology                                 |
| UK             | Mammal Mapper - National Mammal Atlas Project       | Mammal Society                                                |
| UK             | National Bat Monitoring Programme                   | Bat Conservation Trust                                        |
| UK             | Riverfly Recording Schemes                          | Buglife                                                       |
| UK             | Rothamsted Insect Survey Light-trap Network         | Rothamsted Research Centre                                    |
| UK             | UK Ladybird Survey                                  | UK Centre for Ecology and Hydrology, and partners             |
| UK             | UK Wetland Bird Survey                              | British Trust for Ornithology, and partners                   |
| UK             | Wider Countryside Butterfly Survey                  | Butterfly Conservation                                        |

## B. Coordinator survey

Table S2. Coordinator survey. Questionnaire item for information provided to project participants.

| <b>Do you provide your participants with information about the following?</b> |    |                             |                           |                                       |                     |                               |                           |       |
|-------------------------------------------------------------------------------|----|-----------------------------|---------------------------|---------------------------------------|---------------------|-------------------------------|---------------------------|-------|
|                                                                               | No | Yes, on the project website | Yes, through social media | Yes, messages through the project app | Yes, through emails | Yes, through mailings (paper) | Yes, in training sessions | Other |
| Overall objectives / goals / intended outcomes of your project                |    |                             |                           |                                       |                     |                               |                           |       |
| Scientific background and processes of your project                           |    |                             |                           |                                       |                     |                               |                           |       |
| Overall results / outcomes of your project                                    |    |                             |                           |                                       |                     |                               |                           |       |
| Threats to the species that your project focuses on                           |    |                             |                           |                                       |                     |                               |                           |       |
| Opportunities for engaging in conservation activities outside your project    |    |                             |                           |                                       |                     |                               |                           |       |

Table S3. Coordinator survey. Questionnaire item for training provided to project participants.

| <b>What type of training does your citizen science project provide for the participants?</b><br>Please choose all that apply. |  |
|-------------------------------------------------------------------------------------------------------------------------------|--|
| None                                                                                                                          |  |
| Written instructions or training material online                                                                              |  |
| Written instructions or training material in print                                                                            |  |
| Interactive or multimedia online training (video, quiz, etc.)                                                                 |  |
| In-person training (workshop/seminar) - voluntary                                                                             |  |
| In-person training (workshop/seminar) - mandatory                                                                             |  |
| Other:                                                                                                                        |  |

Table S4. Coordinator survey. Questionnaire item for opportunities for social interaction among participants.

| <b>What opportunities for social interaction with other volunteers are available to participants?</b><br>Please choose all that apply. |  |
|----------------------------------------------------------------------------------------------------------------------------------------|--|
| None                                                                                                                                   |  |
| Online discussion forum or list serve / mailing list                                                                                   |  |
| Social media (e.g., Facebook, Twitter, etc.)                                                                                           |  |
| List of volunteers' email addresses                                                                                                    |  |
| List of volunteers' telephone numbers                                                                                                  |  |
| Meetings                                                                                                                               |  |
| Training sessions                                                                                                                      |  |
| Other:                                                                                                                                 |  |

Table S5. Coordinator survey. Questionnaire items for contact between project participants and project staff and scientists.

| <b>How can your participants contact project staff when they have questions or problems?</b><br>Please choose all that apply.                  |  |
|------------------------------------------------------------------------------------------------------------------------------------------------|--|
| Contact form on the project website                                                                                                            |  |
| Message through the project app                                                                                                                |  |
| Email                                                                                                                                          |  |
| Phone                                                                                                                                          |  |
| In person                                                                                                                                      |  |
| Other:                                                                                                                                         |  |
| <b>Do you provide your participants with the opportunity to meet the project scientists personally?</b><br>Please choose one of the following. |  |
| No                                                                                                                                             |  |
| Yes (please specify):                                                                                                                          |  |

Table S6. Coordinator survey. Questionnaire items for feedback and recognition provided to participants.

|                                                                                                                                                                                                       |  |
|-------------------------------------------------------------------------------------------------------------------------------------------------------------------------------------------------------|--|
| <b>Do you provide your participants with individual feedback on their performance of project tasks (e.g., on whether they identified a species correctly)?</b><br>Please choose one of the following. |  |
| No, participants do not receive individual feedback                                                                                                                                                   |  |
| Yes, sometimes                                                                                                                                                                                        |  |
| Yes, regularly                                                                                                                                                                                        |  |
| Yes, they receive feedback every time they submit data                                                                                                                                                |  |
| Other:                                                                                                                                                                                                |  |
| <b>What kind of recognition or reward do volunteers receive for participating in the project?</b><br>Please choose all that apply.                                                                    |  |
| None                                                                                                                                                                                                  |  |
| Positive feedback                                                                                                                                                                                     |  |
| Free equipment or supplies                                                                                                                                                                            |  |
| Certificate                                                                                                                                                                                           |  |
| Promotional items, e.g., stickers, pins, t-shirts                                                                                                                                                     |  |
| Top contributor listings                                                                                                                                                                              |  |
| Personal performance ratings                                                                                                                                                                          |  |
| Public acknowledgment                                                                                                                                                                                 |  |
| New tasks or responsibilities                                                                                                                                                                         |  |
| Naming privileges                                                                                                                                                                                     |  |
| Co-authorship privileges                                                                                                                                                                              |  |
| Volunteer appreciation events                                                                                                                                                                         |  |
| Other:                                                                                                                                                                                                |  |

### C. Participant survey

*Table S7. Participant survey. Questionnaire items for various activities concerning information received, social interaction among participants, and contact with project staff and scientists.*

| <b>As part of your project, approximately how often do you do the following activities?</b> |       |                  |             |                    |                             |                   |                    |           |
|---------------------------------------------------------------------------------------------|-------|------------------|-------------|--------------------|-----------------------------|-------------------|--------------------|-----------|
|                                                                                             | Never | Only once so far | Once a year | A few times a year | About once or twice a month | About once a week | A few times a week | Every day |
| Read project newsletters or other information received from the project                     |       |                  |             |                    |                             |                   |                    |           |
| Communicate with other participants (phone, email, online forum, etc.)                      |       |                  |             |                    |                             |                   |                    |           |
| Communicate with project staff (phone, email, online forum, etc.)                           |       |                  |             |                    |                             |                   |                    |           |
| Meet the project scientist(s) in person                                                     |       |                  |             |                    |                             |                   |                    |           |

*Table S8. Participant survey. Questionnaire item for information received by project participants.*

| <b>Has your project provided you with information about the following?</b> |    |                       |                                |
|----------------------------------------------------------------------------|----|-----------------------|--------------------------------|
|                                                                            | No | Yes, some information | Yes, comprehensive information |
| Overall objectives and goals of your project                               |    |                       |                                |
| Scientific background and processes of the project                         |    |                       |                                |
| Overall results of your project                                            |    |                       |                                |
| Threats to the species that the project focuses on                         |    |                       |                                |
| Opportunities for engaging in conservation activities outside your project |    |                       |                                |

Table S9. Participant survey. Questionnaire item for training received by project participants.

| <b>What kind of training did you receive in order to participate in your project?</b> |                                       |                                         |                |
|---------------------------------------------------------------------------------------|---------------------------------------|-----------------------------------------|----------------|
|                                                                                       | Did not receive this kind of training | Only once, when starting to participate | At least twice |
| Written instructions or training material in print                                    |                                       |                                         |                |
| Written instructions or training material online                                      |                                       |                                         |                |
| Interactive or multimedia online training (video, quiz, etc.)                         |                                       |                                         |                |
| In-person training (workshop/seminar)                                                 |                                       |                                         |                |
| Other training                                                                        |                                       |                                         |                |

Table S10. Participant survey. Questionnaire items for opportunities for social interaction among participants.

|                                                                                                                                          |  |
|------------------------------------------------------------------------------------------------------------------------------------------|--|
| <b>When you collect data for your project, do you work with others (in a pair or in a group)?</b><br>Please choose one of the following. |  |
| No, never                                                                                                                                |  |
| Yes, sometimes                                                                                                                           |  |
| Yes, always                                                                                                                              |  |
| <b>When you work with others, with whom do you collect data for your project?</b><br>Please choose all that apply.                       |  |
| Family members                                                                                                                           |  |
| Friends, acquaintances, or neighbors                                                                                                     |  |
| Community club                                                                                                                           |  |
| Other members of the same citizen science project                                                                                        |  |
| <b>What resources do you use when you want to contact other volunteers?</b><br>Please choose all that apply.                             |  |
| List of volunteers' telephone numbers                                                                                                    |  |
| List of volunteers' email addresses                                                                                                      |  |
| Online discussion forum or list serve / mailing list                                                                                     |  |
| Social media (Facebook, Twitter, etc.)                                                                                                   |  |
| Meetings                                                                                                                                 |  |
| Training sessions                                                                                                                        |  |
| I have not contacted other volunteers yet                                                                                                |  |
| Other:                                                                                                                                   |  |



Table S11. Participant survey. Questionnaire items for feedback and recognition received by participants.

|                                                                                                                                   |  |
|-----------------------------------------------------------------------------------------------------------------------------------|--|
| <b>Have you received any feedback on your performance of project tasks (e.g., on whether you identified a species correctly)?</b> |  |
| Please choose one of the following.                                                                                               |  |
| No, I have not received any feedback yet                                                                                          |  |
| Yes, sometimes                                                                                                                    |  |
| Yes, regularly                                                                                                                    |  |
| Yes, I receive feedback every time I submit data                                                                                  |  |
| <b>Have you received any recognition or reward for participating in the project?</b>                                              |  |
| Please choose all that apply.                                                                                                     |  |
| None                                                                                                                              |  |
| Positive feedback                                                                                                                 |  |
| Free equipment or supplies                                                                                                        |  |
| Certificate                                                                                                                       |  |
| Promotional items, e.g., stickers, pins, t-shirts                                                                                 |  |
| Top contributor listings                                                                                                          |  |
| Personal performance ratings                                                                                                      |  |
| Public acknowledgment                                                                                                             |  |
| New tasks or responsibilities                                                                                                     |  |
| Naming privileges                                                                                                                 |  |
| Co-authorship privileges                                                                                                          |  |
| Volunteer appreciation events                                                                                                     |  |
| Other:                                                                                                                            |  |

Table S12. Participant survey. Questionnaire items for perceived changes in knowledge.

| <b>Environmental and science knowledge</b>                                                                                                                                                  |                   |          |         |       |                |
|---------------------------------------------------------------------------------------------------------------------------------------------------------------------------------------------|-------------------|----------|---------|-------|----------------|
| Please indicate how much you agree or disagree with the following statements.                                                                                                               |                   |          |         |       |                |
| <i>"Participating in this project has made me more aware of ..."</i>                                                                                                                        |                   |          |         |       |                |
|                                                                                                                                                                                             | Strongly disagree | Disagree | Neutral | Agree | Strongly agree |
| <i>...species' presence and behavior.</i>                                                                                                                                                   |                   |          |         |       |                |
| <i>...the principal threats to these species.</i>                                                                                                                                           |                   |          |         |       |                |
| <i>...the diversity of species that exist in my region.</i>                                                                                                                                 |                   |          |         |       |                |
| <b>Biological diversity (or biodiversity) is (among other things) the diversity of species that exist in an area. "Participating in this project has increased my understanding of ..."</b> |                   |          |         |       |                |
|                                                                                                                                                                                             | Strongly disagree | Disagree | Neutral | Agree | Strongly agree |
| <i>...the term 'biological diversity' or 'biodiversity'.</i>                                                                                                                                |                   |          |         |       |                |
| <i>...the importance of biological diversity.</i>                                                                                                                                           |                   |          |         |       |                |
| <i>...the threats to biological diversity.</i>                                                                                                                                              |                   |          |         |       |                |
| <b>"As a result of participation in this project, I've learned a lot about ..."</b>                                                                                                         |                   |          |         |       |                |
|                                                                                                                                                                                             | Strongly disagree | Disagree | Neutral | Agree | Strongly agree |
| <i>...the species I have found or observed.</i>                                                                                                                                             |                   |          |         |       |                |
| <i>...the environment and nature in general.</i>                                                                                                                                            |                   |          |         |       |                |
| <i>...how science works.</i>                                                                                                                                                                |                   |          |         |       |                |

Table S13. Participant survey. Questionnaire items for perceived changes in skills (adapted from Phillips, T., Porticella, N., and Bonney, R., 2017. Skills for Science Inquiry Scale. Technical Brief Series. Cornell Laboratory of Ornithology, Ithaca).

| <b>Skills and competences</b>                                                                       |                   |          |         |       |                |
|-----------------------------------------------------------------------------------------------------|-------------------|----------|---------|-------|----------------|
| Please indicate how much you agree or disagree with the following statements.                       |                   |          |         |       |                |
| <i>"Through participating in the project I have gained or improved the skills necessary to ..."</i> |                   |          |         |       |                |
|                                                                                                     | Strongly disagree | Disagree | Neutral | Agree | Strongly agree |
| <i>...observe/record species.</i>                                                                   |                   |          |         |       |                |
| <i>...identify different species.</i>                                                               |                   |          |         |       |                |
| <i>...collect data in a standardized manner.</i>                                                    |                   |          |         |       |                |
| <i>...submit my observations to the project database.</i>                                           |                   |          |         |       |                |
| <i>...use the project database to answer a question.</i>                                            |                   |          |         |       |                |
| <i>...interpret the meaning of project data presented in maps, charts, graphs, etc.</i>             |                   |          |         |       |                |
| <i>...conduct statistical analyses using project data.</i>                                          |                   |          |         |       |                |
| <i>...design my own study related to project data.</i>                                              |                   |          |         |       |                |
| <i>...communicate project findings to others.</i>                                                   |                   |          |         |       |                |
| <i>...train others to participate in the project.</i>                                               |                   |          |         |       |                |
